# Supplementary material for: The self-exchange of a nonbonding electron via the outer-sphere pathway: reorganizational energy and electronic coupling matrix element for the V(OH2)62+/3+, Ru(OH2)62+/3+, V(OH2)63+/4+, and Ru(OH2)63+/4+ couples
Source: Royal Society of Chemistry journal article supplement (doi:10.1039/b108627h), 2002-01-01
Supplement: b108627h.doc [file b108627h.doc]

Electronic supplementary information (B 108627 H)

*************************************************

Table S1: [V(OH2)6 . (OH2)12]2+, T symmetry, 4A state

_____________________________________________________

COORDINATES OF SYMMETRY UNIQUE ATOMS (ANGS)

-------------------------------------------

ATOM CHARGE X Y Z

------------------------------------------------------------

V 23.0 .0000000000 .0000000000 .0000000000

O 8.0 .0000000000 .0000000000 2.1847426840

H 1.0 .7396288074 .3208380081 2.7034371896

O 8.0 2.1495188384 1.2829149164 3.4489190558

H 1.0 2.8917103646 1.3457859390 2.8000431023

H 1.0 2.4469807510 1.0422483308 4.3462357580

############################################################

Table S2: [V(OH2)6 . (OH2)12]3+, D2 symmetry, 3B2 state

_______________________________________________________

COORDINATES OF SYMMETRY UNIQUE ATOMS (ANGS)

-------------------------------------------

ATOM CHARGE X Y Z

------------------------------------------------------------

V 23.0 .0000000000 .0000000000 .0000000000

O 8.0 2.0157525291 .0000000000 .0000000000

O 8.0 .0000000000 2.0707032939 .0000000000

O 8.0 .0000000000 .0000000000 2.0480405317

H 1.0 2.5515481017 .7709965092 .2667271830

H 1.0 .3181858515 2.6081470669 .7431797267

H 1.0 .7328263695 .3559925364 2.5819582751

O 8.0 3.3305678287 2.0576922310 1.0805135576

O 8.0 1.1997493342 3.4206388045 2.0171324044

O 8.0 2.0388051698 1.1980267022 3.3326475633

H 1.0 2.7596065568 2.8517901133 1.2124835695

H 1.0 1.2861079209 2.8656962051 2.8271082264

H 1.0 2.8310770928 1.2817895863 2.7522210311

H 1.0 4.2581377247 2.2915565515 .8693607761

H 1.0 1.0155733735 4.3607622544 2.2236196967

H 1.0 2.2762557644 1.0038866409 4.2634893329

############################################################

Table S3: [V(OH2)6 . (OH2)12]4+, D2 symmetry, 2B3 state

_______________________________________________________

COORDINATES OF SYMMETRY UNIQUE ATOMS (ANGS)

-------------------------------------------

ATOM CHARGE X Y Z

------------------------------------------------------------

V 23.0 .0000000000 .0000000000 .0000000000

O 8.0 1.8605015409 .0000000000 .0000000000

O 8.0 .0000000000 1.9575340186 .0000000000

O 8.0 .0000000000 .0000000000 2.0150105283

H 1.0 2.4649368958 .8516815049 -.1483588418

H 1.0 .5442054011 2.5192218540 .6134481189

H 1.0 .5745305098 .5621738548 2.5709262710

O 8.0 3.2124572250 2.0211250414 -.1843774644

O 8.0 1.5821784536 3.3146120174 1.5638720338

O 8.0 1.4809849480 1.6258156820 3.6910805271

H 1.0 2.9318744293 2.7417362207 .4222639328

H 1.0 1.6538691419 2.8979521291 2.4575933245

H 1.0 2.3557783117 1.3027793174 4.0144605741

H 1.0 4.0546329230 2.1901286205 -.6558734706

H 1.0 1.5837822539 4.2977074460 1.6128894764

H 1.0 .9681589515 1.9814179972 4.4568633562

############################################################

Table S4: [Ru(OH2)6 . (OH2)12]2+, T symmetry, 1A state

______________________________________________________

COORDINATES OF SYMMETRY UNIQUE ATOMS (ANGS)

-------------------------------------------

ATOM CHARGE X Y Z

------------------------------------------------------------

RU 44.0 .0000000000 .0000000000 .0000000000

O 8.0 .0000000000 .0000000000 2.1876695284

H 1.0 .7360220921 .3363875707 2.7000730460

O 8.0 2.1358360117 1.2911731083 3.4511056293

H 1.0 2.8828212350 1.3460938188 2.8067675073

H 1.0 2.4248855710 1.0512419524 4.3514673712

############################################################

Table S5: [Ru(OH2)6 . (OH2)12]3+, D2 symmetry, 2B2 state

________________________________________________________

COORDINATES OF SYMMETRY UNIQUE ATOMS (ANGS)

-------------------------------------------

ATOM CHARGE X Y Z

------------------------------------------------------------

RU 44.0 .0000000000 .0000000000 .0000000000

O 8.0 2.0522433972 .0000000000 .0000000000

O 8.0 .0000000000 2.1093448876 .0000000000

O 8.0 .0000000000 .0000000000 2.0833127636

H 1.0 2.5781261346 .7723279178 .2786984851

H 1.0 .3546670743 2.6415543268 .7284300818

H 1.0 .7015080476 .4238353720 2.6085696410

O 8.0 3.3440436320 2.0567881608 1.1013715908

O 8.0 1.2391672422 3.4841942382 1.9740427440

O 8.0 1.9945209150 1.2832854139 3.3487962839

H 1.0 2.7839166455 2.8629390632 1.2077035545

H 1.0 1.2973286937 2.9524468266 2.8021190018

H 1.0 2.7963457663 1.3321358617 2.7767934443

H 1.0 4.2802075650 2.2708812174 .9074398819

H 1.0 1.0673439403 4.4335440651 2.1460151716

H 1.0 2.2144101758 1.1074814458 4.2877184349

############################################################

Table S6: [Ru(OH2)6 . (OH2)12]4+, D2 symmetry, 3B3 state

________________________________________________________

COORDINATES OF SYMMETRY UNIQUE ATOMS (ANGS)

-------------------------------------------

ATOM CHARGE X Y Z

------------------------------------------------------------

RU 44.0 .0000000000 .0000000000 .0000000000

O 8.0 1.9566376207 .0000000000 .0000000000

O 8.0 .0000000000 2.0227959501 .0000000000

O 8.0 .0000000000 .0000000000 2.0532266339

H 1.0 2.5315430245 .8598591304 -.0881203252

H 1.0 .5355253211 2.5804740364 .6252712584

H 1.0 .4281494821 .6828706548 2.6081343979

O 8.0 3.2585799412 2.0823019355 -.0710384801

O 8.0 1.5136650935 3.4000508566 1.5944894187

O 8.0 1.1728633283 1.8028843310 3.7625534257

H 1.0 2.9501926134 2.7911247872 .5335777179

H 1.0 1.5086688272 3.0270835515 2.5092007670

H 1.0 2.0100633682 1.5052973088 4.1935753051

H 1.0 4.1221408624 2.2654359320 -.4969294031

H 1.0 1.5396523596 4.3839366988 1.5957070483

H 1.0 .5764421723 2.1899644544 4.4485396875

############################################################

Table S7: {[V(OH2)6]2}5+, S6 symmetry

_____________________________________

(i) d(V...V) = 9.451 A:

COORDINATES OF SYMMETRY UNIQUE ATOMS (ANGS)

-------------------------------------------

ATOM CHARGE X Y Z

------------------------------------------------------------

V 23.0 .0000000000 .0000000000 4.7255000000

O 8.0 1.5804179629 .9350673716 3.6529749164

O 8.0 1.4809245318 -.8840581528 5.9943218458

H 1.0 2.1729393202 .5303983330 3.0213248758

H 1.0 1.8668917341 1.8252172848 3.8652361087

H 1.0 1.2650245007 -1.4403385015 6.7461053420

H 1.0 2.4269670410 -.7318559553 5.9671411021

............................................................

(ii) d(V...V) = 7.948 A:

COORDINATES OF SYMMETRY UNIQUE ATOMS (ANGS)

-------------------------------------------

ATOM CHARGE X Y Z

------------------------------------------------------------

V 23.0 .0000000000 .0000000000 3.9738093548

O 8.0 1.6046574803 .9526946197 2.9478891522

O 8.0 1.4747273601 -.8854675615 5.2559036497

H 1.0 2.2617586044 .5507641564 2.3818842850

H 1.0 1.8587569353 1.8491207754 3.1766673827

H 1.0 1.2457583751 -1.4420593349 6.0042165096

H 1.0 2.4200510839 -.7246168517 5.2560509364

............................................................

(iii) d(V...V) = 7.50 A:

COORDINATES OF SYMMETRY UNIQUE ATOMS (ANGS)

-------------------------------------------

ATOM CHARGE X Y Z

------------------------------------------------------------

V 23.0 .0000000000 .0000000000 3.7499942473

O 8.0 1.6140180868 .9577297012 2.7399151923

O 8.0 1.4733680100 -.8852502304 5.0357603674

H 1.0 2.2984963609 .5550243019 2.2077569505

H 1.0 1.8500009742 1.8601526263 2.9652802433

H 1.0 1.2410105340 -1.4452464815 5.7807129358

H 1.0 2.4176622055 -.7182552747 5.0468086676

............................................................

(iv) d(V...V) = 6.959 A:

COORDINATES OF SYMMETRY UNIQUE ATOMS (ANGS)

-------------------------------------------

ATOM CHARGE X Y Z

------------------------------------------------------------

V 23.0 .0000000000 .0000000000 3.4794995267

O 8.0 1.6224681436 .9668664583 2.4879572838

O 8.0 1.4693919901 -.8872949286 4.7716335893

H 1.0 2.3277695923 .5682181042 1.9803474674

H 1.0 1.8507652098 1.8672194726 2.7300839670

H 1.0 1.2295707996 -1.4435863452 5.5173376190

H 1.0 2.4141353551 -.7225281697 4.7924228460

............................................................

(v) d(V...V) = 6.50 A:

COORDINATES OF SYMMETRY UNIQUE ATOMS (ANGS)

-------------------------------------------

ATOM CHARGE X Y Z

------------------------------------------------------------

V 23.0 .0000000000 .0000000000 3.2500012701

O 8.0 1.6328620589 .9745091944 2.2779574818

O 8.0 1.4672471446 -.8882348573 4.5468209536

H 1.0 2.3579865838 .5792986242 1.7960067664

H 1.0 1.8502678296 1.8750292804 2.5302922259

H 1.0 1.2229833804 -1.4441393874 5.2916885433

H 1.0 2.4114021239 -.7205660065 4.5773850873

............................................................

(vi) d(V...V) = 6.30 A:

COORDINATES OF SYMMETRY UNIQUE ATOMS (ANGS)

-------------------------------------------

ATOM CHARGE X Y Z

------------------------------------------------------------

V 23.0 .0000000000 .0000000000 3.1499999371

O 8.0 1.6369666993 .9780950134 2.1860130622

O 8.0 1.4648570265 -.8878229015 4.4505173833

H 1.0 2.3684620495 .5839603597 1.7127436581

H 1.0 1.8532875617 1.8767001054 2.4465564444

H 1.0 1.2176261274 -1.4413614100 5.1963019161

H 1.0 2.4091863587 -.7212904788 4.4843274726

............................................................

(vii) d(V...V) = 6.00 A:

COORDINATES OF SYMMETRY UNIQUE ATOMS (ANGS)

-------------------------------------------

ATOM CHARGE X Y Z

------------------------------------------------------------

V 23.0 .0000000000 .0000000000 3.0000004144

O 8.0 1.6436749432 .9832580527 2.0489215691

O 8.0 1.4638645906 -.8886785023 4.3031644279

H 1.0 2.3874321137 .5913098138 1.5931011594

H 1.0 1.8528581384 1.8814363031 2.3173091303

H 1.0 1.2139749579 -1.4407094629 5.0494599772

H 1.0 2.4083451188 -.7230173256 4.3413399850

############################################################

Table S8: {[V(OH2)6]2}7+, S6 symmetry

_____________________________________

(i) d(V...V) = 6.50 A:

COORDINATES OF SYMMETRY UNIQUE ATOMS (ANGS)

-------------------------------------------

ATOM CHARGE X Y Z

------------------------------------------------------------

V 23.0 .0000000000 .0000000000 3.2499968534

O 8.0 1.5532234848 .8998710503 2.3256100957

O 8.0 1.3748786605 -.8083193266 4.4970230207

H 1.0 2.3026607678 .4852401391 1.8755895135

H 1.0 1.7936090480 1.8192003169 2.5397864630

H 1.0 1.1443476783 -1.3645420762 5.2650721400

H 1.0 2.3361626454 -.6593008420 4.5359897701

............................................................

(ii) d(V...V) = 6.30 A:

COORDINATES OF SYMMETRY UNIQUE ATOMS (ANGS)

-------------------------------------------

ATOM CHARGE X Y Z

------------------------------------------------------------

V 23.0 .0000000000 .0000000000 3.1499988642

O 8.0 1.5583174694 .9030454382 2.2338269558

O 8.0 1.3735120364 -.8085033607 4.3995384426

H 1.0 2.3201139105 .4894570692 1.8034774879

H 1.0 1.7910115428 1.8244898700 2.4483443696

H 1.0 1.1411367182 -1.3669375558 5.1656991505

H 1.0 2.3338991519 -.6546813821 4.4462234934

............................................................

(iii) d(V...V) = 6.00 A:

COORDINATES OF SYMMETRY UNIQUE ATOMS (ANGS)

-------------------------------------------

ATOM CHARGE X Y Z

------------------------------------------------------------

V 23.0 .0000000000 .0000000000 2.9999999688

O 8.0 1.5664734739 .9069987652 2.0961942762

O 8.0 1.3721200250 -.8074434771 4.2532796649

H 1.0 2.3440026108 .4949917633 1.6925121690

H 1.0 1.7905376510 1.8301035254 2.3142955112

H 1.0 1.1366221179 -1.3668478365 5.0182136013

H 1.0 2.3318744750 -.6506139906 4.3085455255

############################################################

Table S9: {[Ru(OH2)6]2}5+, S6 symmetry

______________________________________

(i) d(Ru...Ru) = 9.457 A:

COORDINATES OF SYMMETRY UNIQUE ATOMS (ANGS)

-------------------------------------------

ATOM CHARGE X Y Z

------------------------------------------------------------

RU 44.0 .0000000000 .0000000000 4.7284999894

O 8.0 1.5739054964 .9264840494 3.5992345177

O 8.0 1.5057735446 -.8964124798 5.9732636760

H 1.0 2.1850719364 .4784230138 3.0183274498

H 1.0 1.8347785508 1.8345349248 3.7551067786

H 1.0 1.3000895549 -1.4902233738 6.6976346797

H 1.0 2.4404151557 -.6873832480 5.9658303889

............................................................

(ii) d(Ru...Ru) = 7.888 A:

COORDINATES OF SYMMETRY UNIQUE ATOMS (ANGS)

-------------------------------------------

ATOM CHARGE X Y Z

------------------------------------------------------------

RU 44.0 .0000000000 .0000000000 3.9438162404

O 8.0 1.5904195485 .9406825165 2.8429669819

O 8.0 1.5004886730 -.8990317917 5.1954078611

H 1.0 2.2670718691 .4922030739 2.3401950835

H 1.0 1.8235148120 1.8550490612 3.0086034028

H 1.0 1.2840676173 -1.4943355509 5.9162782445

H 1.0 2.4336631446 -.6822624765 5.2141225972

............................................................

(iii) d(Ru...Ru) = 6.996 A:

COORDINATES OF SYMMETRY UNIQUE ATOMS (ANGS)

-------------------------------------------

ATOM CHARGE X Y Z

------------------------------------------------------------

RU 44.0 .0000000000 .0000000000 3.4979965003

O 8.0 1.6009782141 .9518649562 2.4157509702

O 8.0 1.4970714516 -.9030696845 4.7531535486

H 1.0 2.3157872517 .5069378214 1.9650900638

H 1.0 1.8173972802 1.8683660314 2.5940520414

H 1.0 1.2727906955 -1.4981939110 5.4724078805

H 1.0 2.4293327568 -.6829127397 4.7887906450

............................................................

(iv) d(Ru...Ru) = 6.80 A:

COORDINATES OF SYMMETRY UNIQUE ATOMS (ANGS)

-------------------------------------------

ATOM CHARGE X Y Z

------------------------------------------------------------

RU 44.0 .0000000000 .0000000000 3.3999993223

O 8.0 1.6034141036 .9550295106 2.3222408972

O 8.0 1.4958659938 -.9046684618 4.6559542327

H 1.0 2.3298441464 .5116273392 1.8887933772

H 1.0 1.8119597629 1.8735844971 2.4997291397

H 1.0 1.2692204072 -1.5013065034 5.3733482579

H 1.0 2.4276566462 -.6832006158 4.6973821225

............................................................

(v) d(Ru...Ru) = 6.50 A:

COORDINATES OF SYMMETRY UNIQUE ATOMS (ANGS)

-------------------------------------------

ATOM CHARGE X Y Z

------------------------------------------------------------

RU 44.0 .0000000000 .0000000000 3.2499995089

O 8.0 1.6075742426 .9595762816 2.1794982562

O 8.0 1.4945077816 -.9059132441 4.5074900198

H 1.0 2.3411826103 .5178353108 1.7564800570

H 1.0 1.8160318368 1.8758750905 2.3694138676

H 1.0 1.2655409860 -1.5006587858 5.2259903544

H 1.0 2.4262983395 -.6844648619 4.5528451298

............................................................

(vi) d(Ru...Ru) = 6.00 A:

COORDINATES OF SYMMETRY UNIQUE ATOMS (ANGS)

-------------------------------------------

ATOM CHARGE X Y Z

------------------------------------------------------------

RU 44.0 .0000000000 .0000000000 2.9999902804

O 8.0 1.6156893043 .9683141798 1.9429728225

O 8.0 1.4914171973 -.9071783085 4.2612750673

H 1.0 2.3606854541 .5286078375 1.5377693685

H 1.0 1.8269756676 1.8782997932 2.1602881149

H 1.0 1.2569593378 -1.4940168020 4.9849891428

H 1.0 2.4248387807 -.6920186198 4.3090157993

############################################################

Table S10: {[Ru(OH2)6]2}7+, S6 symmetry

_______________________________________

(i) d(Ru...Ru) = 7.90 A:

COORDINATES OF SYMMETRY UNIQUE ATOMS (ANGS)

-------------------------------------------

ATOM CHARGE X Y Z

------------------------------------------------------------

RU 44.0 .0000000000 .0000000000 3.9500002879

O 8.0 1.5490211512 .9055371327 2.9094410510

O 8.0 1.4282060691 -.8379874701 5.1848720804

H 1.0 2.2111937318 .4678939238 2.3610095758

H 1.0 1.8328840981 1.8121222237 3.1098516770

H 1.0 1.2154888848 -1.3888229897 5.9597609300

H 1.0 2.3888158408 -.6911180144 5.1682486713

............................................................

(ii) d(Ru...Ru) = 7.20 A:

COORDINATES OF SYMMETRY UNIQUE ATOMS (ANGS)

-------------------------------------------

ATOM CHARGE X Y Z

------------------------------------------------------------

RU 44.0 .0000000000 .0000000000 3.5999995092

O 8.0 1.5639148338 .9140169779 2.5805846344

O 8.0 1.4253561196 -.8381147853 4.8393533141

H 1.0 2.2698451341 .4757279826 2.0897187976

H 1.0 1.8228104055 1.8289264392 2.7789709494

H 1.0 1.2069226197 -1.3962950175 5.6082313049

H 1.0 2.3846359732 -.6784684822 4.8442393792

............................................................

(iii) d(Ru...Ru) = 6.80 A:

COORDINATES OF SYMMETRY UNIQUE ATOMS (ANGS)

-------------------------------------------

ATOM CHARGE X Y Z

------------------------------------------------------------

RU 44.0 .0000000000 .0000000000 3.4000008818

O 8.0 1.5709790693 .9216777557 2.3926143444

O 8.0 1.4217447699 -.8404153906 4.6428958700

H 1.0 2.3002312052 .4858217366 1.9342004943

H 1.0 1.8170119217 1.8396382096 2.5948133702

H 1.0 1.1979457427 -1.3969190929 5.4120226049

H 1.0 2.3816941697 -.6828914545 4.6552462887

............................................................

(iv) d(Ru...Ru) = 6.50 A:

COORDINATES OF SYMMETRY UNIQUE ATOMS (ANGS)

-------------------------------------------

ATOM CHARGE X Y Z

------------------------------------------------------------

RU 44.0 .0000000000 .0000000000 3.2499976664

O 8.0 1.5786734541 .9257092717 2.2527537955

O 8.0 1.4204769379 -.8394755848 4.4953635229

H 1.0 2.3247920952 .4906084955 1.8210743579

H 1.0 1.8157102016 1.8459087383 2.4566565107

H 1.0 1.1942907116 -1.3978652156 5.2628937470

H 1.0 2.3800070330 -.6783344854 4.5156942584

............................................................

(v) d(Ru...Ru) = 6.00 A:

COORDINATES OF SYMMETRY UNIQUE ATOMS (ANGS)

-------------------------------------------

ATOM CHARGE X Y Z

------------------------------------------------------------

RU 44.0 .0000000000 .0000000000 2.9999760692

O 8.0 1.5915104836 .9337521377 2.0205197650

O 8.0 1.4176362461 -.8394775766 4.2495508653

H 1.0 2.3631458198 .5019477920 1.6313007124

H 1.0 1.8149557629 1.8561892510 2.2320660104

H 1.0 1.1864813775 -1.3995455142 5.0152199188

H 1.0 2.3764125745 -.6727867183 4.2841631098

############################################################
